# Supplementary material for: Spatially Segregated Transmission of Co-Occluded Baculoviruses Limits Virus–Virus Interactions Mediated by Cellular Coinfection during Primary Infection
Source: MDPI journal article supplement (doi:10.3390/v14081697), 2022-07-31
Supplement: s1 [file s1]

**Table S1.** PCR primers

| Primer          | Sequence                               |
|-----------------|----------------------------------------|
| mCherry_F       | 5'-GGTCTCGCGAGATGGTGAGCAAGGGCGAGGAG-3' |
| mCherry_R       | 5'-GGGCCGGCGAGACCCTACTTGTACAGCTCGTC-3' |
| eGFP-F          | 5'-TTGAAGAAGTCGTGCTGCTTCAT-3'          |
| Polyhedrin-R    | 5'-ATCCTCAGCCACTAGGTAGTTGT-3'          |
| Universal_p10-F | 5'-CCTTTAATTCAACCCAACACAATA-3'         |
